# Supplementary material for: Sub-Millimetre Resolution Laminar Fmri Using Arterial Spin Labelling in Humans at 7 T
Source: bioRxiv or medRxiv preprint supplement (doi:10.1101/2020.08.22.261693), 2020-08-24
Supplement: Supplementary file [file media-1.pdf]

# 1 SUPPORTING FIGURES

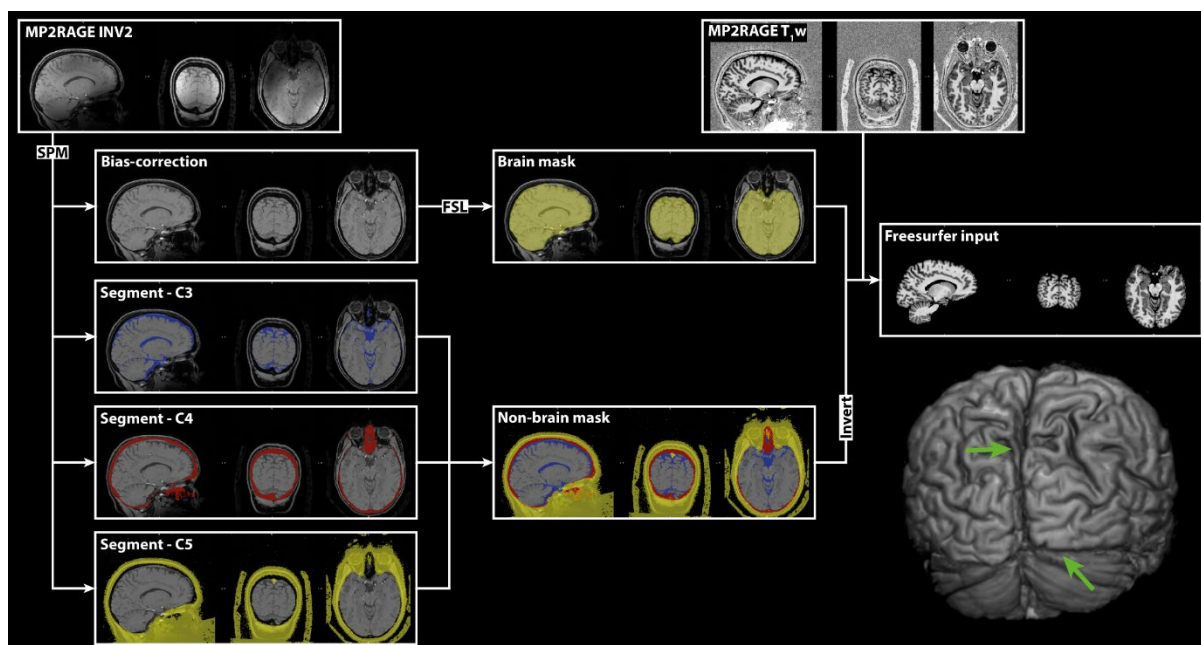

2

3 S1 Fig. Anatomical data pre-processing workflow for MP2RAGE data for input to  
4 Freesurfer's recon-all. Tissue classes C3-C5 were thresholded on a subject-by-  
5 subject basis to include as much of the sagittal and transverse sinuses as possible.  
6 In most of our subjects, this procedure did not require any manual correction of the  
7 combined mask. ITK-SNAP v. 3.6 (Yushkevich et al., 2006) was used to make any  
8 manual corrections when required. The Freesurfer T1-w input is presented as a 3D  
9 render showing an intact GM surface at the occipital lobe with the green arrows  
10 indicating locations of the now automatically stripped sagittal and transverse sinuses.

11

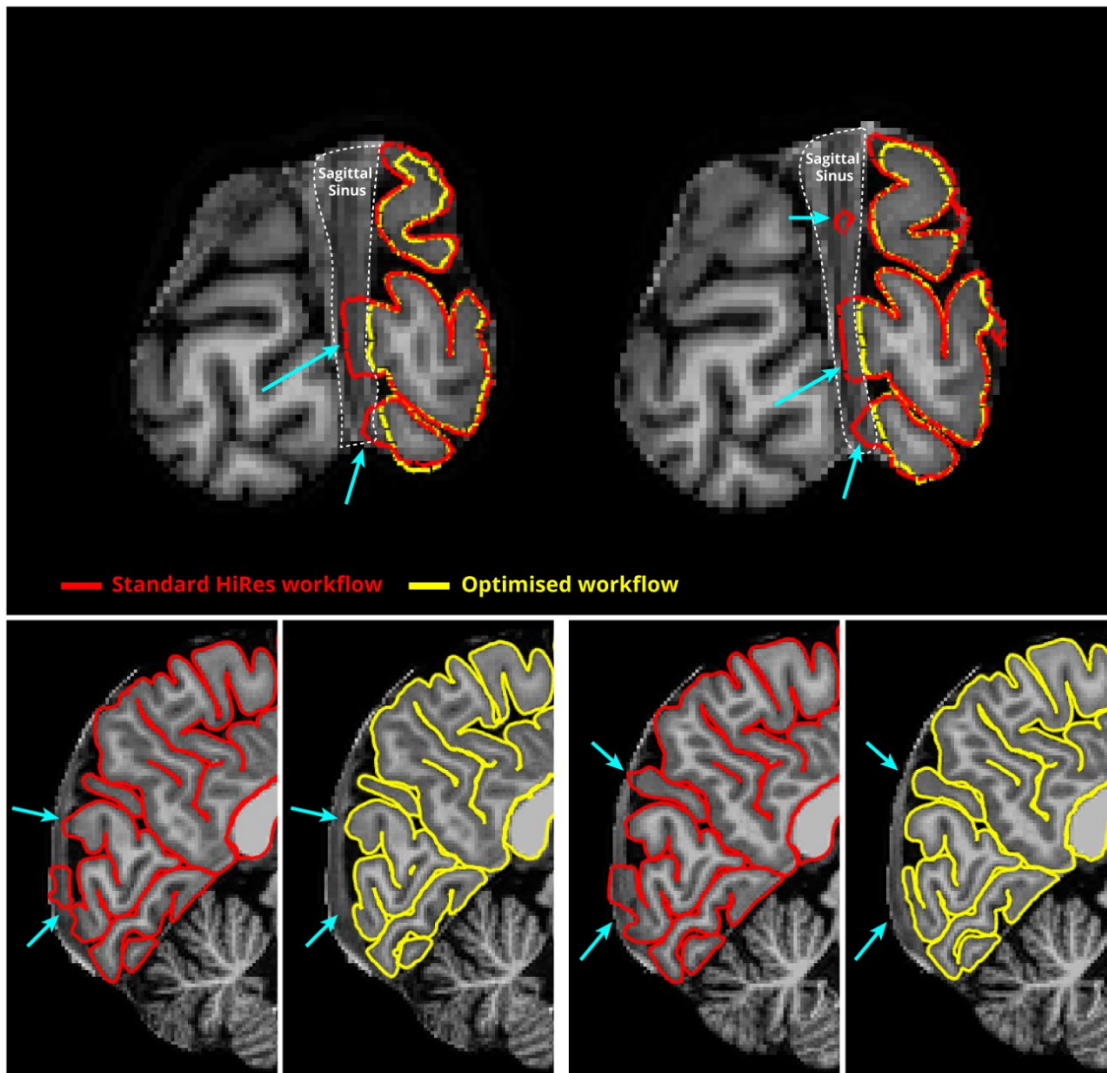

12

13 S2 Fig. (top) Coronal view of the pial surface overlaid on a standard skull-stripped T1-  
 14 w image. Shown in red is determined from the standard HiRes workflow and in yellow  
 15 is determined from the optimised workflow shown in Supplementary Fig 1. White  
 16 dotted lines indicate sagittal sinus and cyan arrows emphasise the erroneous  
 17 placement of the pial surface in the standard workflow. (bottom) Sagittal views of the  
 18 pial surface from the standard and optimised workflows to further illustrate their  
 19 differences in outcome indicated by the cyan arrows.

20

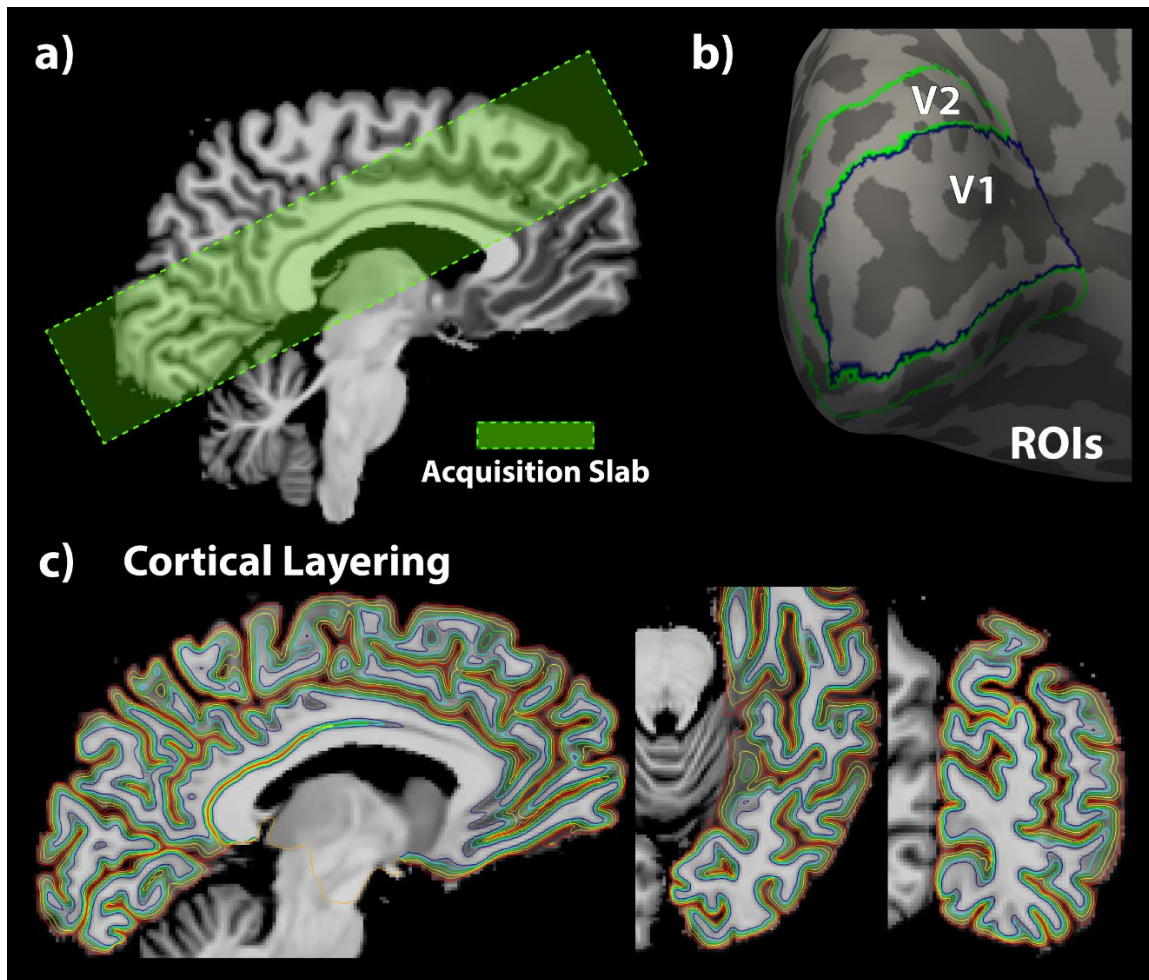

21

22 S3 Fig. Illustration of (a) the extent and orientation of the acquisition slab (b) the atlas-  
23 based delineation of the V1 and V2 ROIs (c) a subset of all laminar surfaces overlaid  
24 on one hemisphere.

25

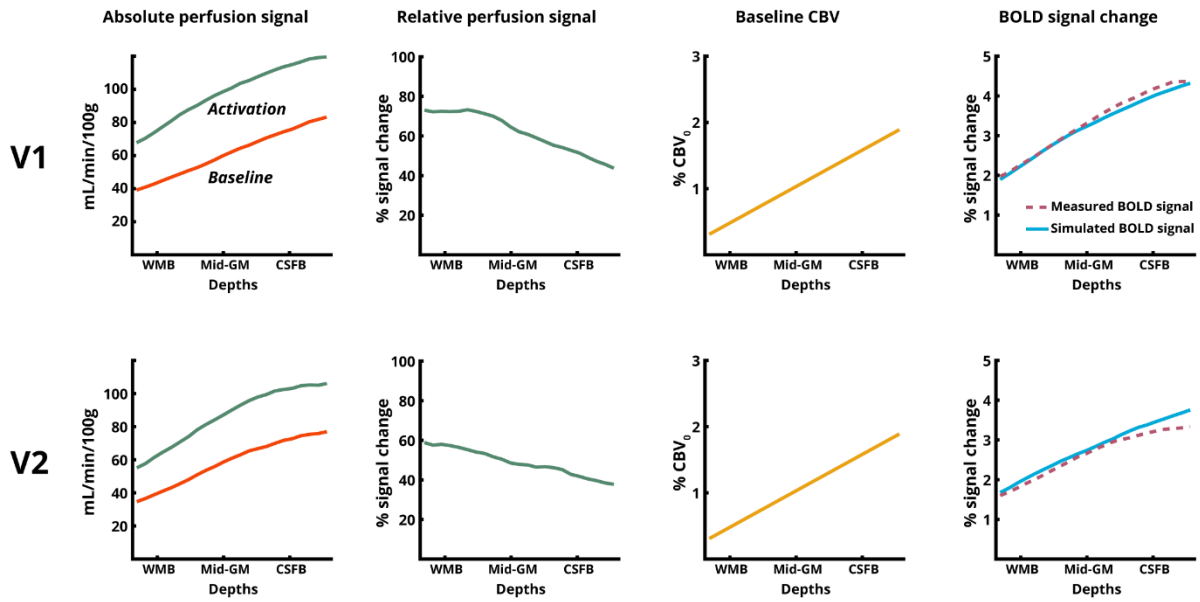

26

27 S4 Fig. (left-to-right) Measured absolute perfusion signal for activation and baseline,  
 28 relative perfusion laminar profile obtained from measured absolute perfusion data,  
 29 assumed laminar baseline blood volume, and comparison of measured BOLD signal  
 30 change and simulated BOLD signal change as predicted by the dynamical laminar  
 31 BOLD model (Havlicek and Uludağ, 2020).

32

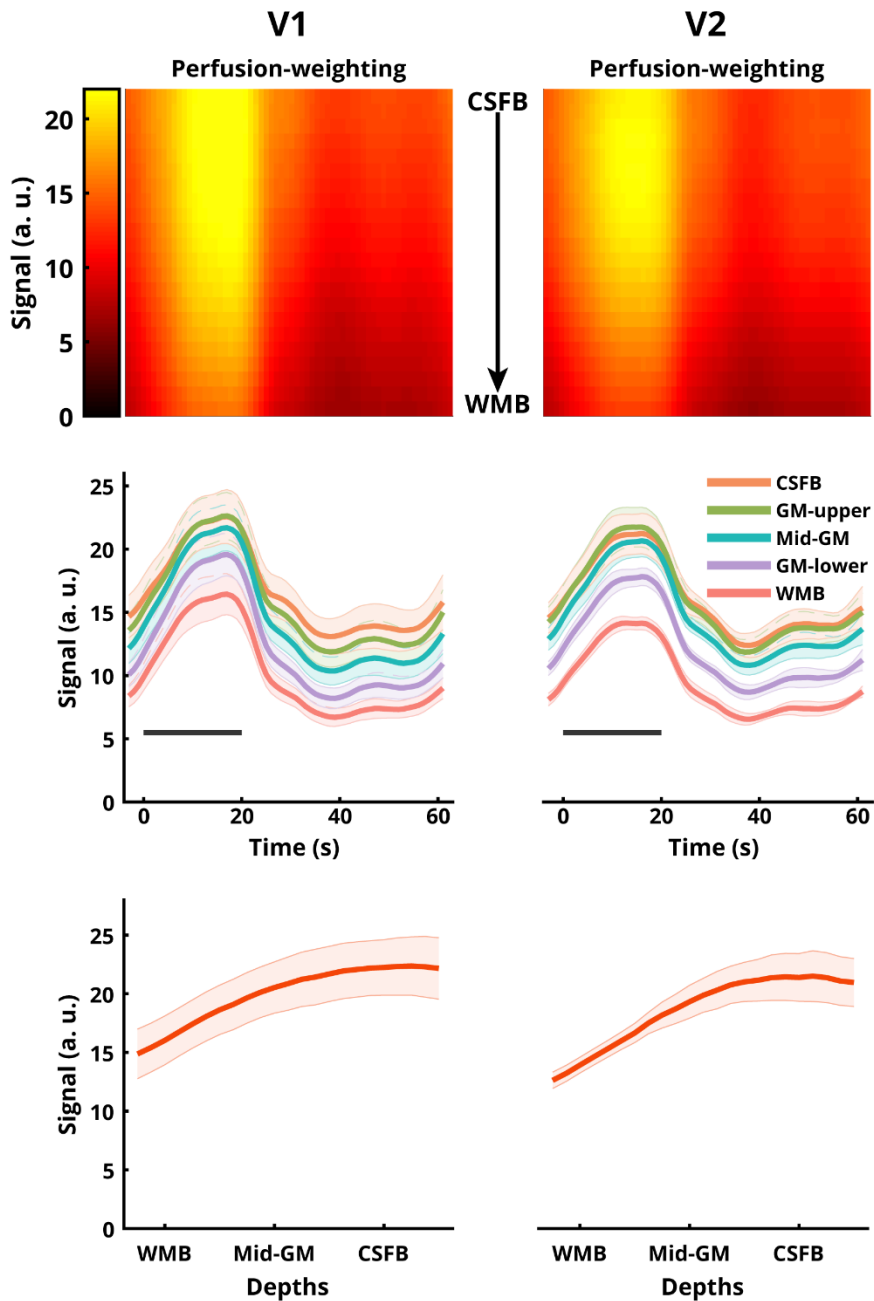

33

34 S5 Fig. Laminar profile of the perfusion-weighted signal (obtained after surround-  
 35 subtraction) in human V1 and V2 from the sub-millimetre 3D-EPI ASL at 7T. (top row)  
 36 Heatmap representations of the group-average perfusion-weighted signal with cortical  
 37 depth along Y-axis and Time along the X-axis. (middle row) Five out of the twenty-  
 38 three total laminar time-courses and (bottom row) laminar profiles of the positive  
 39 response for the perfusion-weighted signal. All error-bars indicate SEM. The grey bar  
 40 in the middle row indicates the stimulus duration.

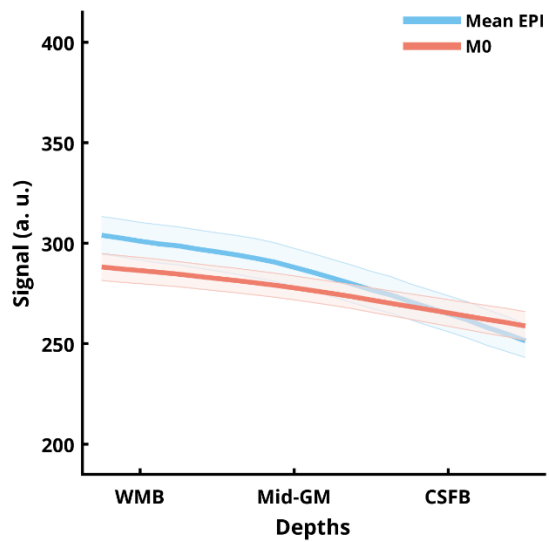

41

42 S6 Fig. Laminar profile of the mean EPI from the sub-millimetre 3D-EPI ASL and long

43 TR calibration image (M0) at 7T.

44

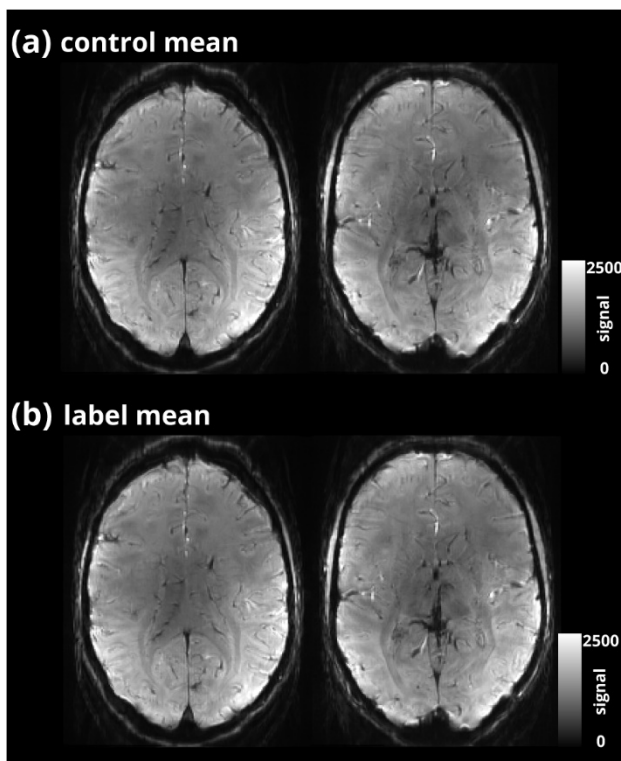

45

46 S7 Fig. Temporal mean EPI image of all control (a) and label (b) volumes from a single

47 ASL run.

48

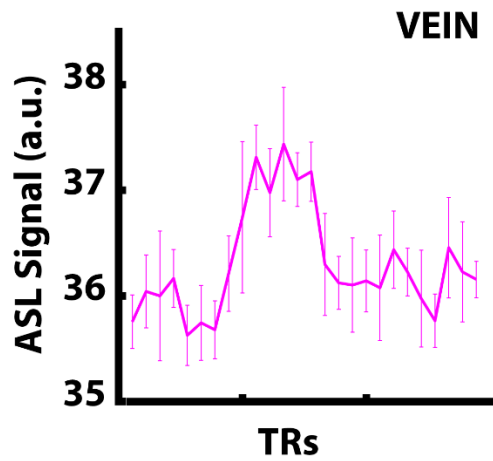

49

50 S8 Fig. Event-related average ASL time-course sampled from the sagittal sinus near

51 V1. Error bars indicate SEM across trials. Please note the near absence of the

52 characteristic ASL zig-zag signal modulation and the scale of the Y-axis.

53

54
